# Supplementary material for: Magnetic and Electrical Properties of Nitrogen‐Doped Multiwall Carbon Nanotubes Fabricated by a Modified Chemical Vapor Deposition Method
Source: Hindawi journal article supplement (doi:10.1155/2015/587416), 2015-01-01
Supplement: f1 [file 587416.f1.doc]

**Supplementary information.**

Magnetic and electrical properties of nitrogen-doped multiwall carbon nanotubes fabricated by a modified chemical vapor deposition method.

Garcia-Betancourt, et al.


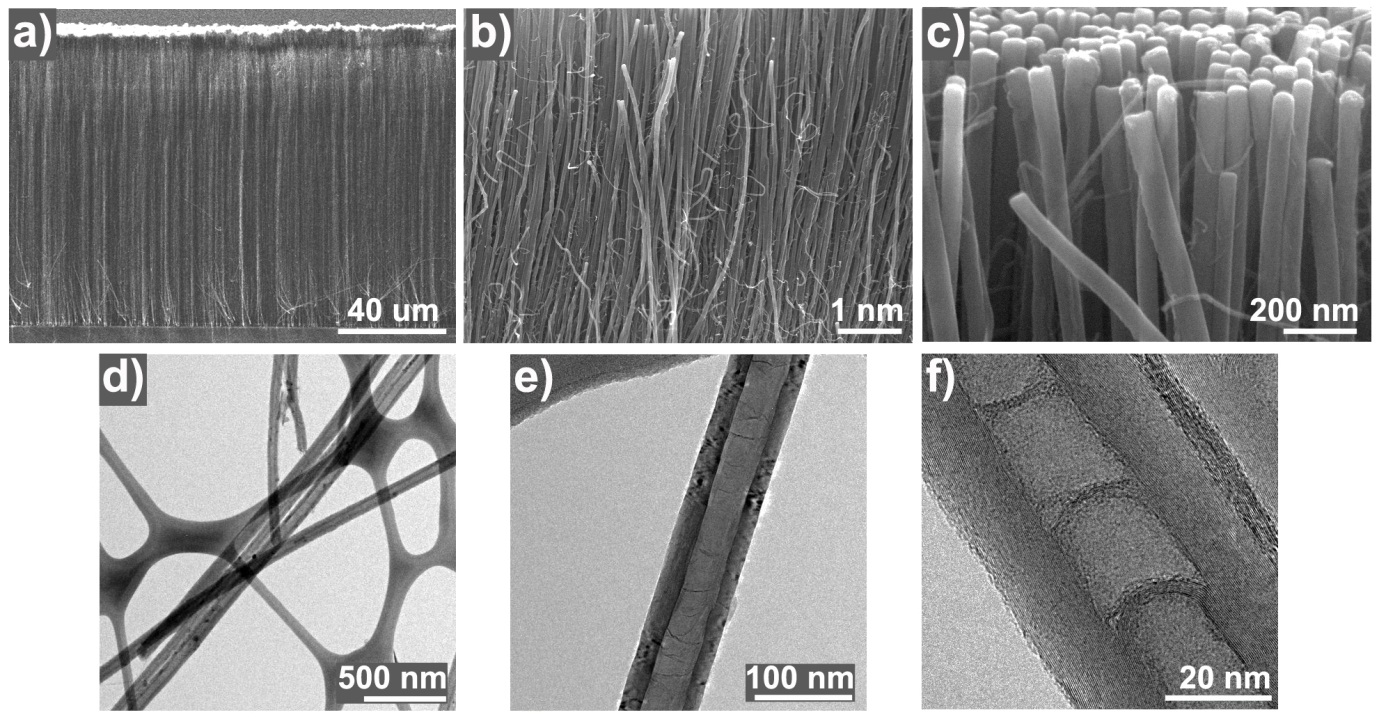


Fig. S1. Scanning electron microscopy images of nitrogen doped carbon nanotubes (N-MWCNTs) synthesized by CVD using acetone in the trap: (a) growth perpendicularly and highly aligned to the Si/SiO2 substrate. (b) General view of the N-MWCNTs morphology. (c) Higher magnification of (100 000 X) in SEM image of the CNT containing catalytic particles at the ends. As can be seen, the N-MWCNTs diameter is 70 nm and the ~10% has small diameter ~15 nm. (d) General view of some N-MWCNTs seen by HRTEM. (e) N-MWCNTs morphology with not well defined bamboo compartments. (f) Higher magnification of another N-MWCNTs, in this case note the well-defined bamboo compartments.


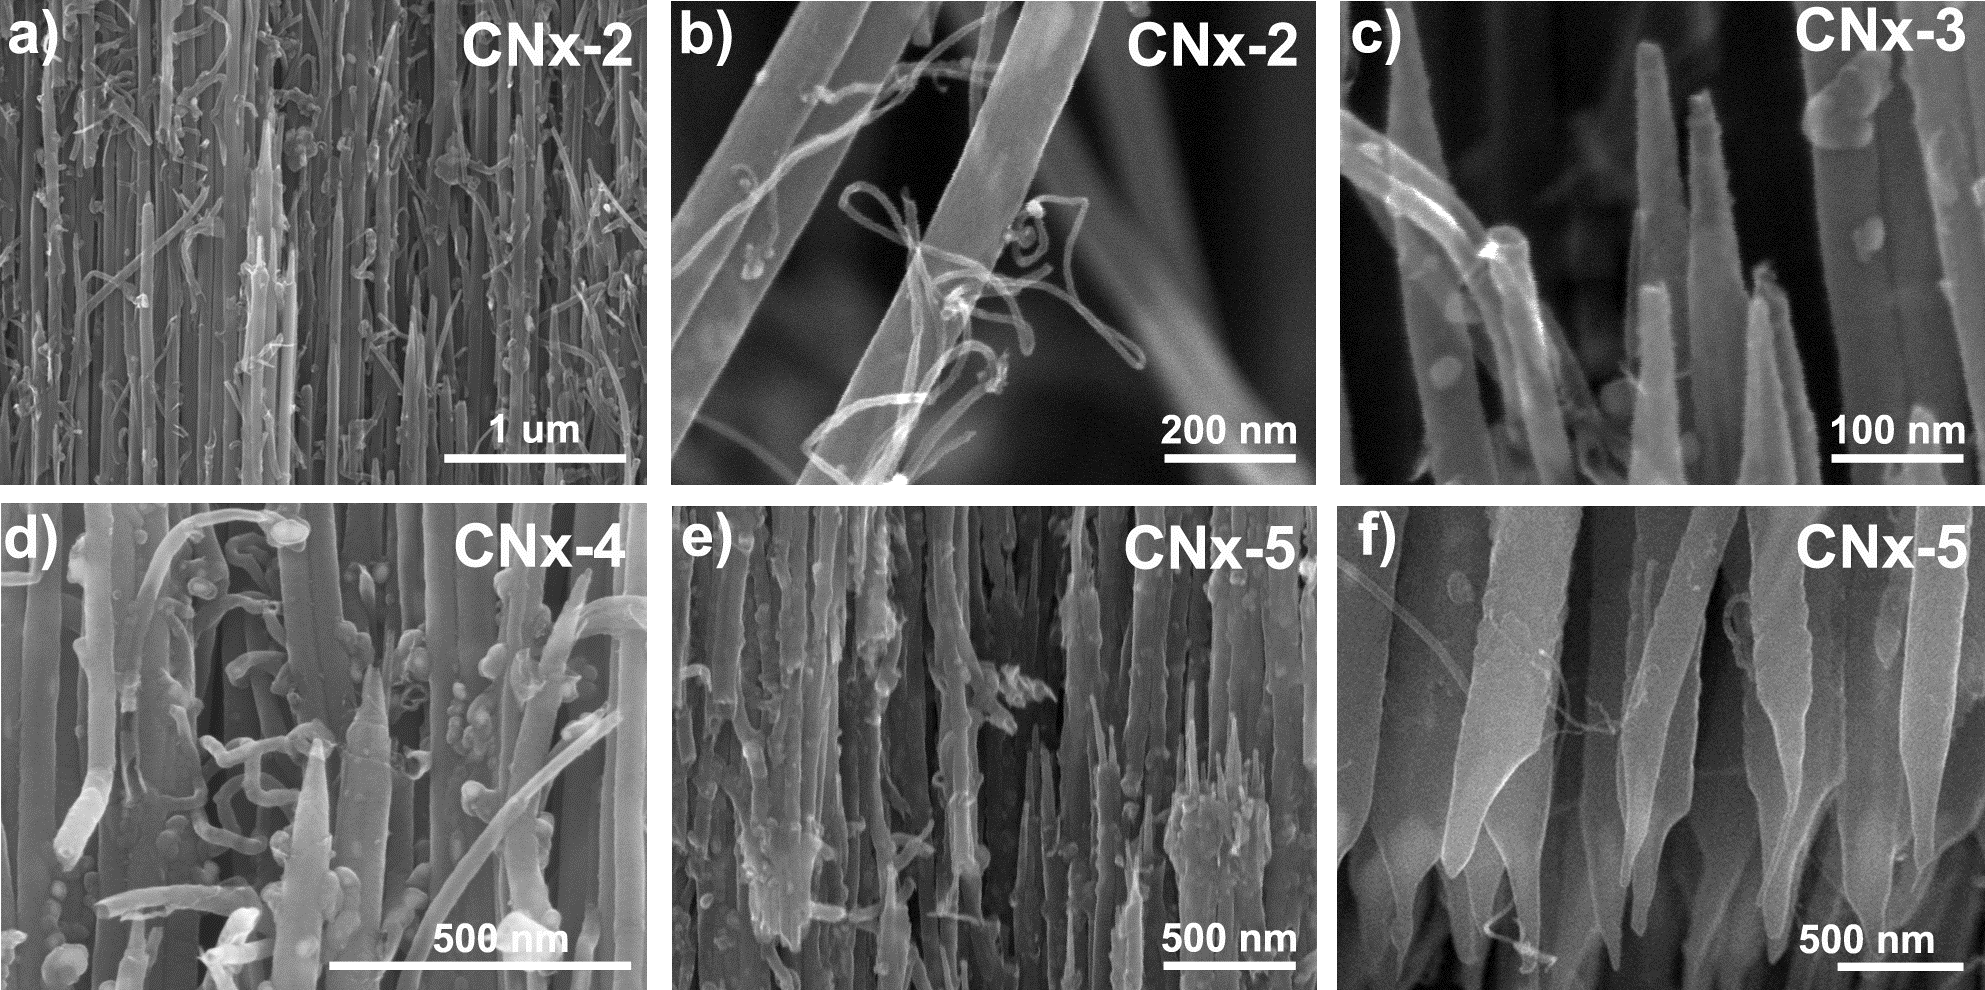


Fig. S1. SEM images of the aligned N-MWCNTs grew over Si/SiO2 substrates displaying the different morphologies observed: (a) and (b) are CNx-2; (c) is CNx-3; (d) is CNx-4; (e) and (f) CNx-5. Dramatic changes are observed as NaCl is included in the trap.


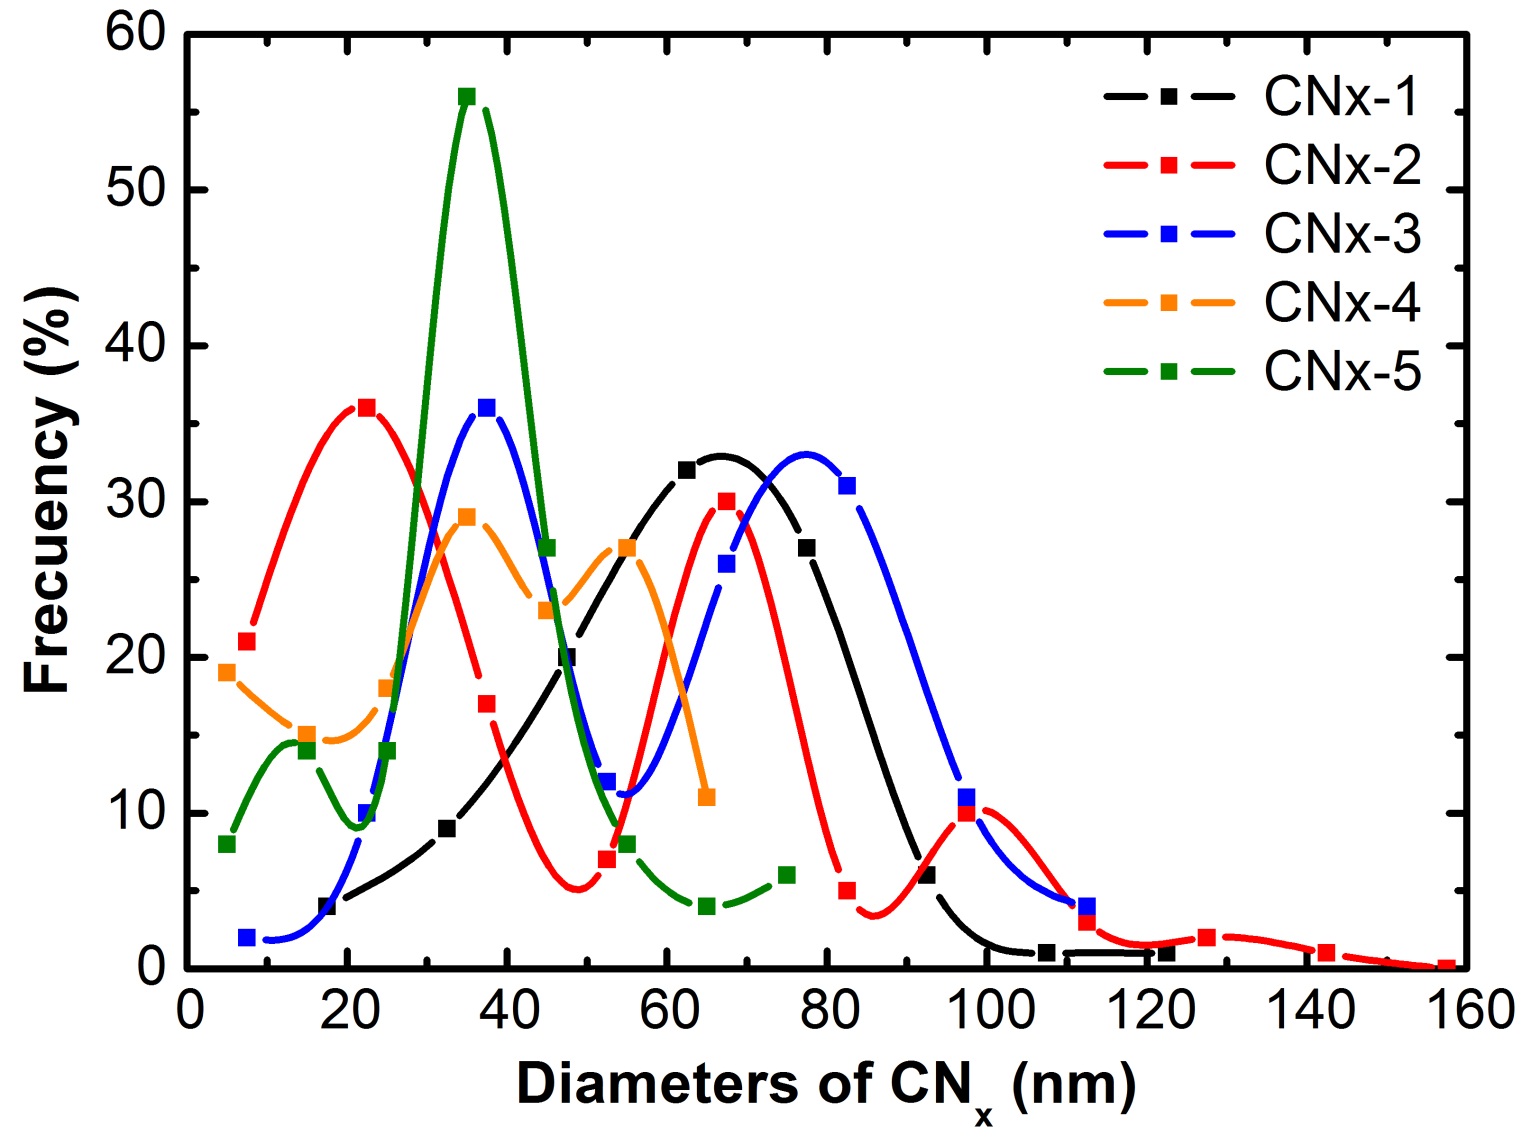


Fig. S3. a) Diameter distribution of the CNx synthesized with different substances in the residual bubbler: CNx-1 (C3H6O), CNx-2 (H2O) and three weight concentrations of NaCl, CNx-3 (1 %), CNx-4 (15.48 %) and CNx-5 (26.92%).


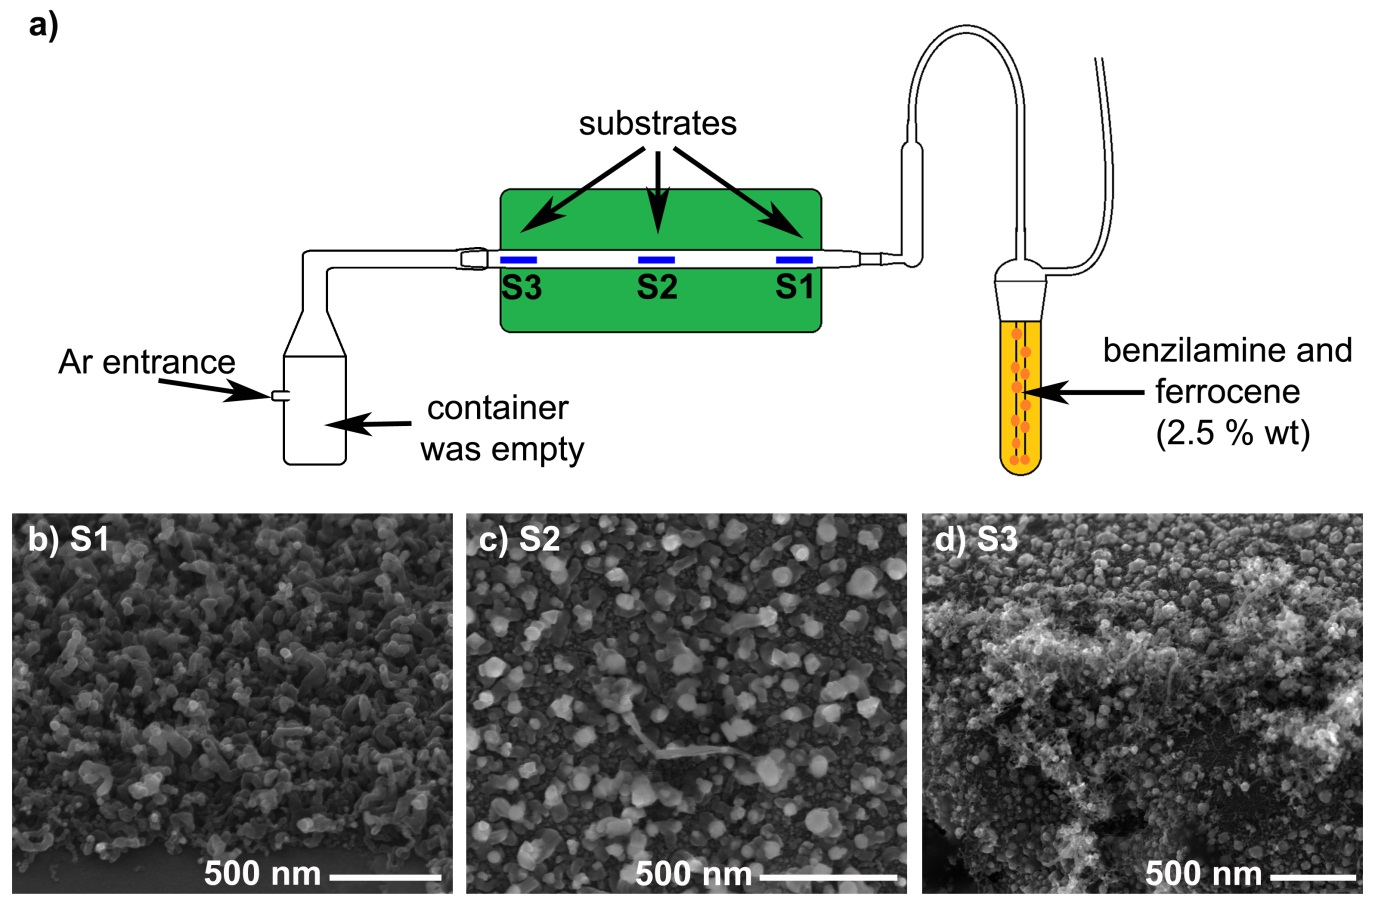


Fig. S4. a) Schematic array of CVD but placing the precursors in the trap where acetone is deposited for bubbling. (b-d) SEM images of the resulting material that grew in the substrates located at the three positions.

Fig. S4 depicts the schematic array of CVD similar than used in our experiment. The difference is that trap was used to deposit the carbon, iron, and nitrogen precursors instead acetone. Additionally the original container used in CVD was remained empty. The experiment in this form was performed in order to demonstrate that the content in the trap travels until the hot zone in the furnace. For this purpose three supports of Si/SiO2 were placed inside the quartz zone located at the entrance (S1), at the center (S2) and at the final zone (S3). The used parameters during the experiment were the same used in the synthesis of CNx using acetone, water and aqueous solutions of NaCl. The parameters were used as follows: 1) Inert gas was Ar at 0.5 l/min for purging and cooling, while 2.5 l/min was used during synthesis. 2) The time of synthesis was 30 min. 3) Temperature used in the synthesis was 850C. Fig. S4b-d Exhibit SEM images of the resulting material that grew in the substrates located at the three positions. Fig. S4b shows the resulting material for S1, at the entrance, formed in to a forest of nonaligned CNT which diameters are 40 nm. Fig. S4c presents the material formed in the substrate was located in the center (S2). As can be seen nanoparticles of different diameters and shapes were formed. The contrast difference suggests that the nanoparticles have an extra deposit of material that can be carbon. In this image we can also see some short nanotubes that grew form nanoparticles (see arrows). The longest CNT is 550 nm and diameter is 40 nm. Fig. S4d shows the material collected in S3, collocated at the entrance. The final material at this position is formed by nanoparticles
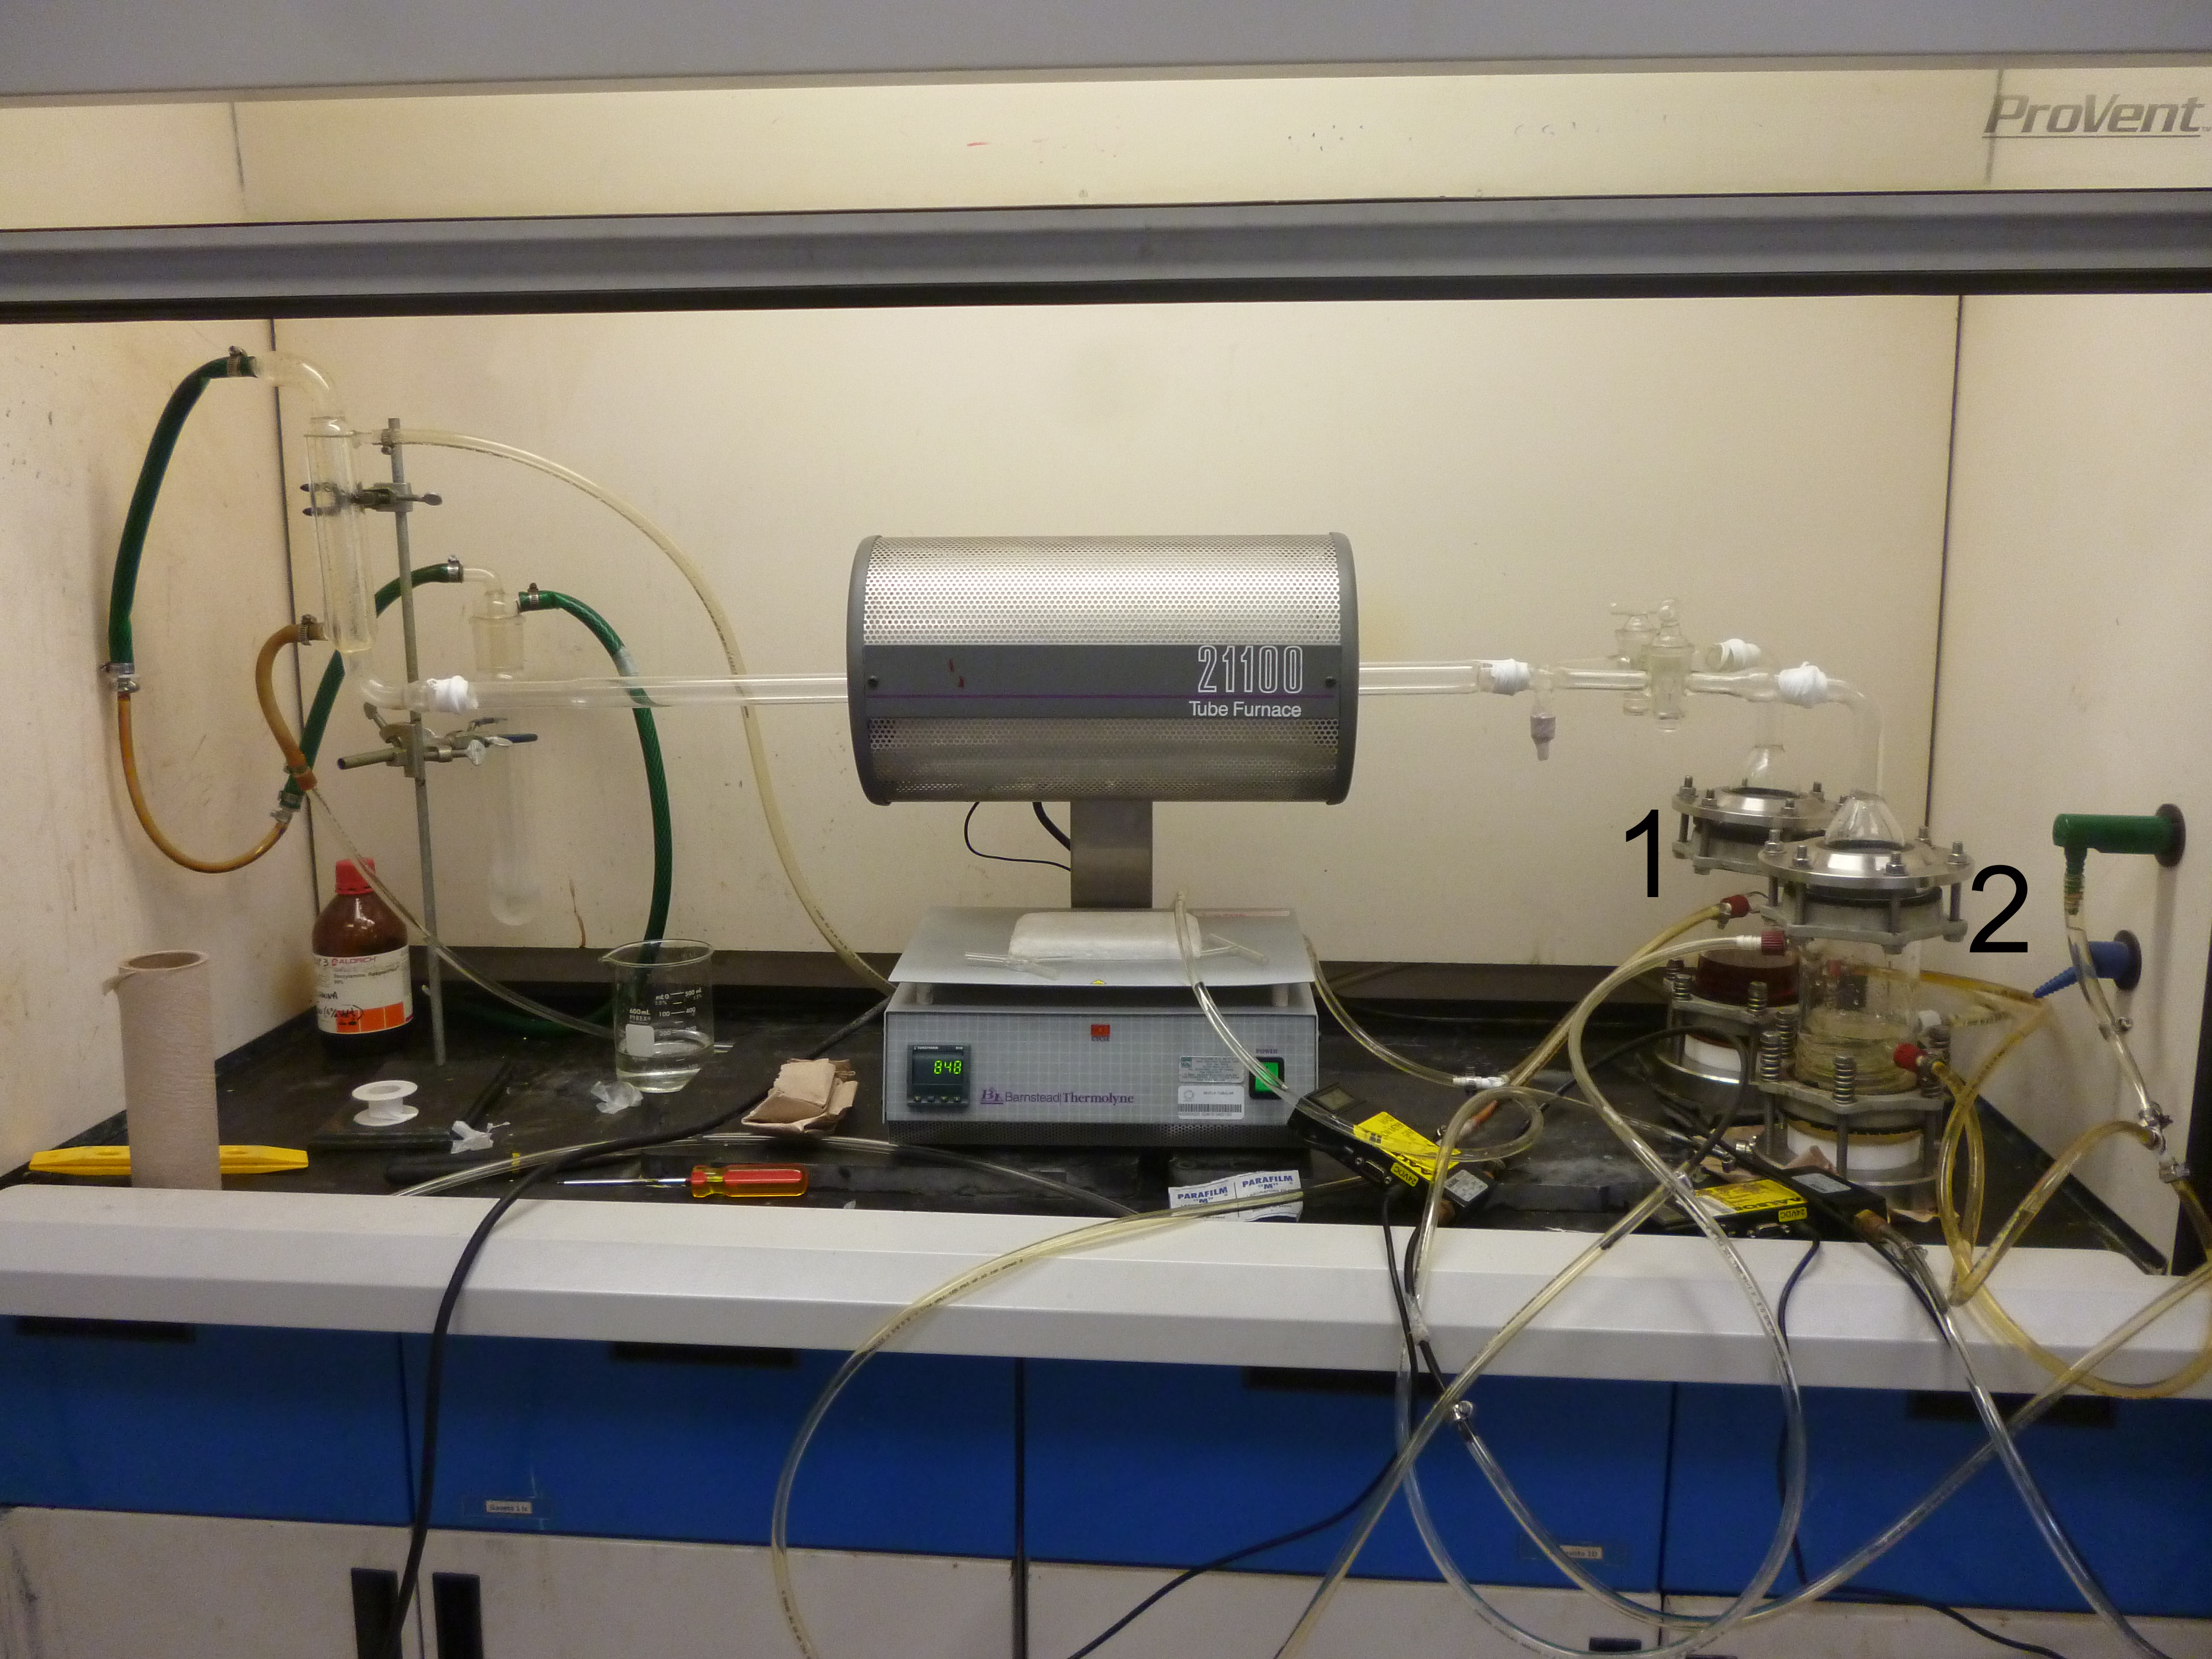
of variable sizes and thin CNT of less than 20 nm.

## Fig. S5. Photograph of the array of CVD equipment with two sprayer (1 and 2) to fabricate N-MWCNTs with altered morphology. Sprayer 1 contains the same solution than the original experiment. Sprayer 2 contains an aqueous solution of NaCl


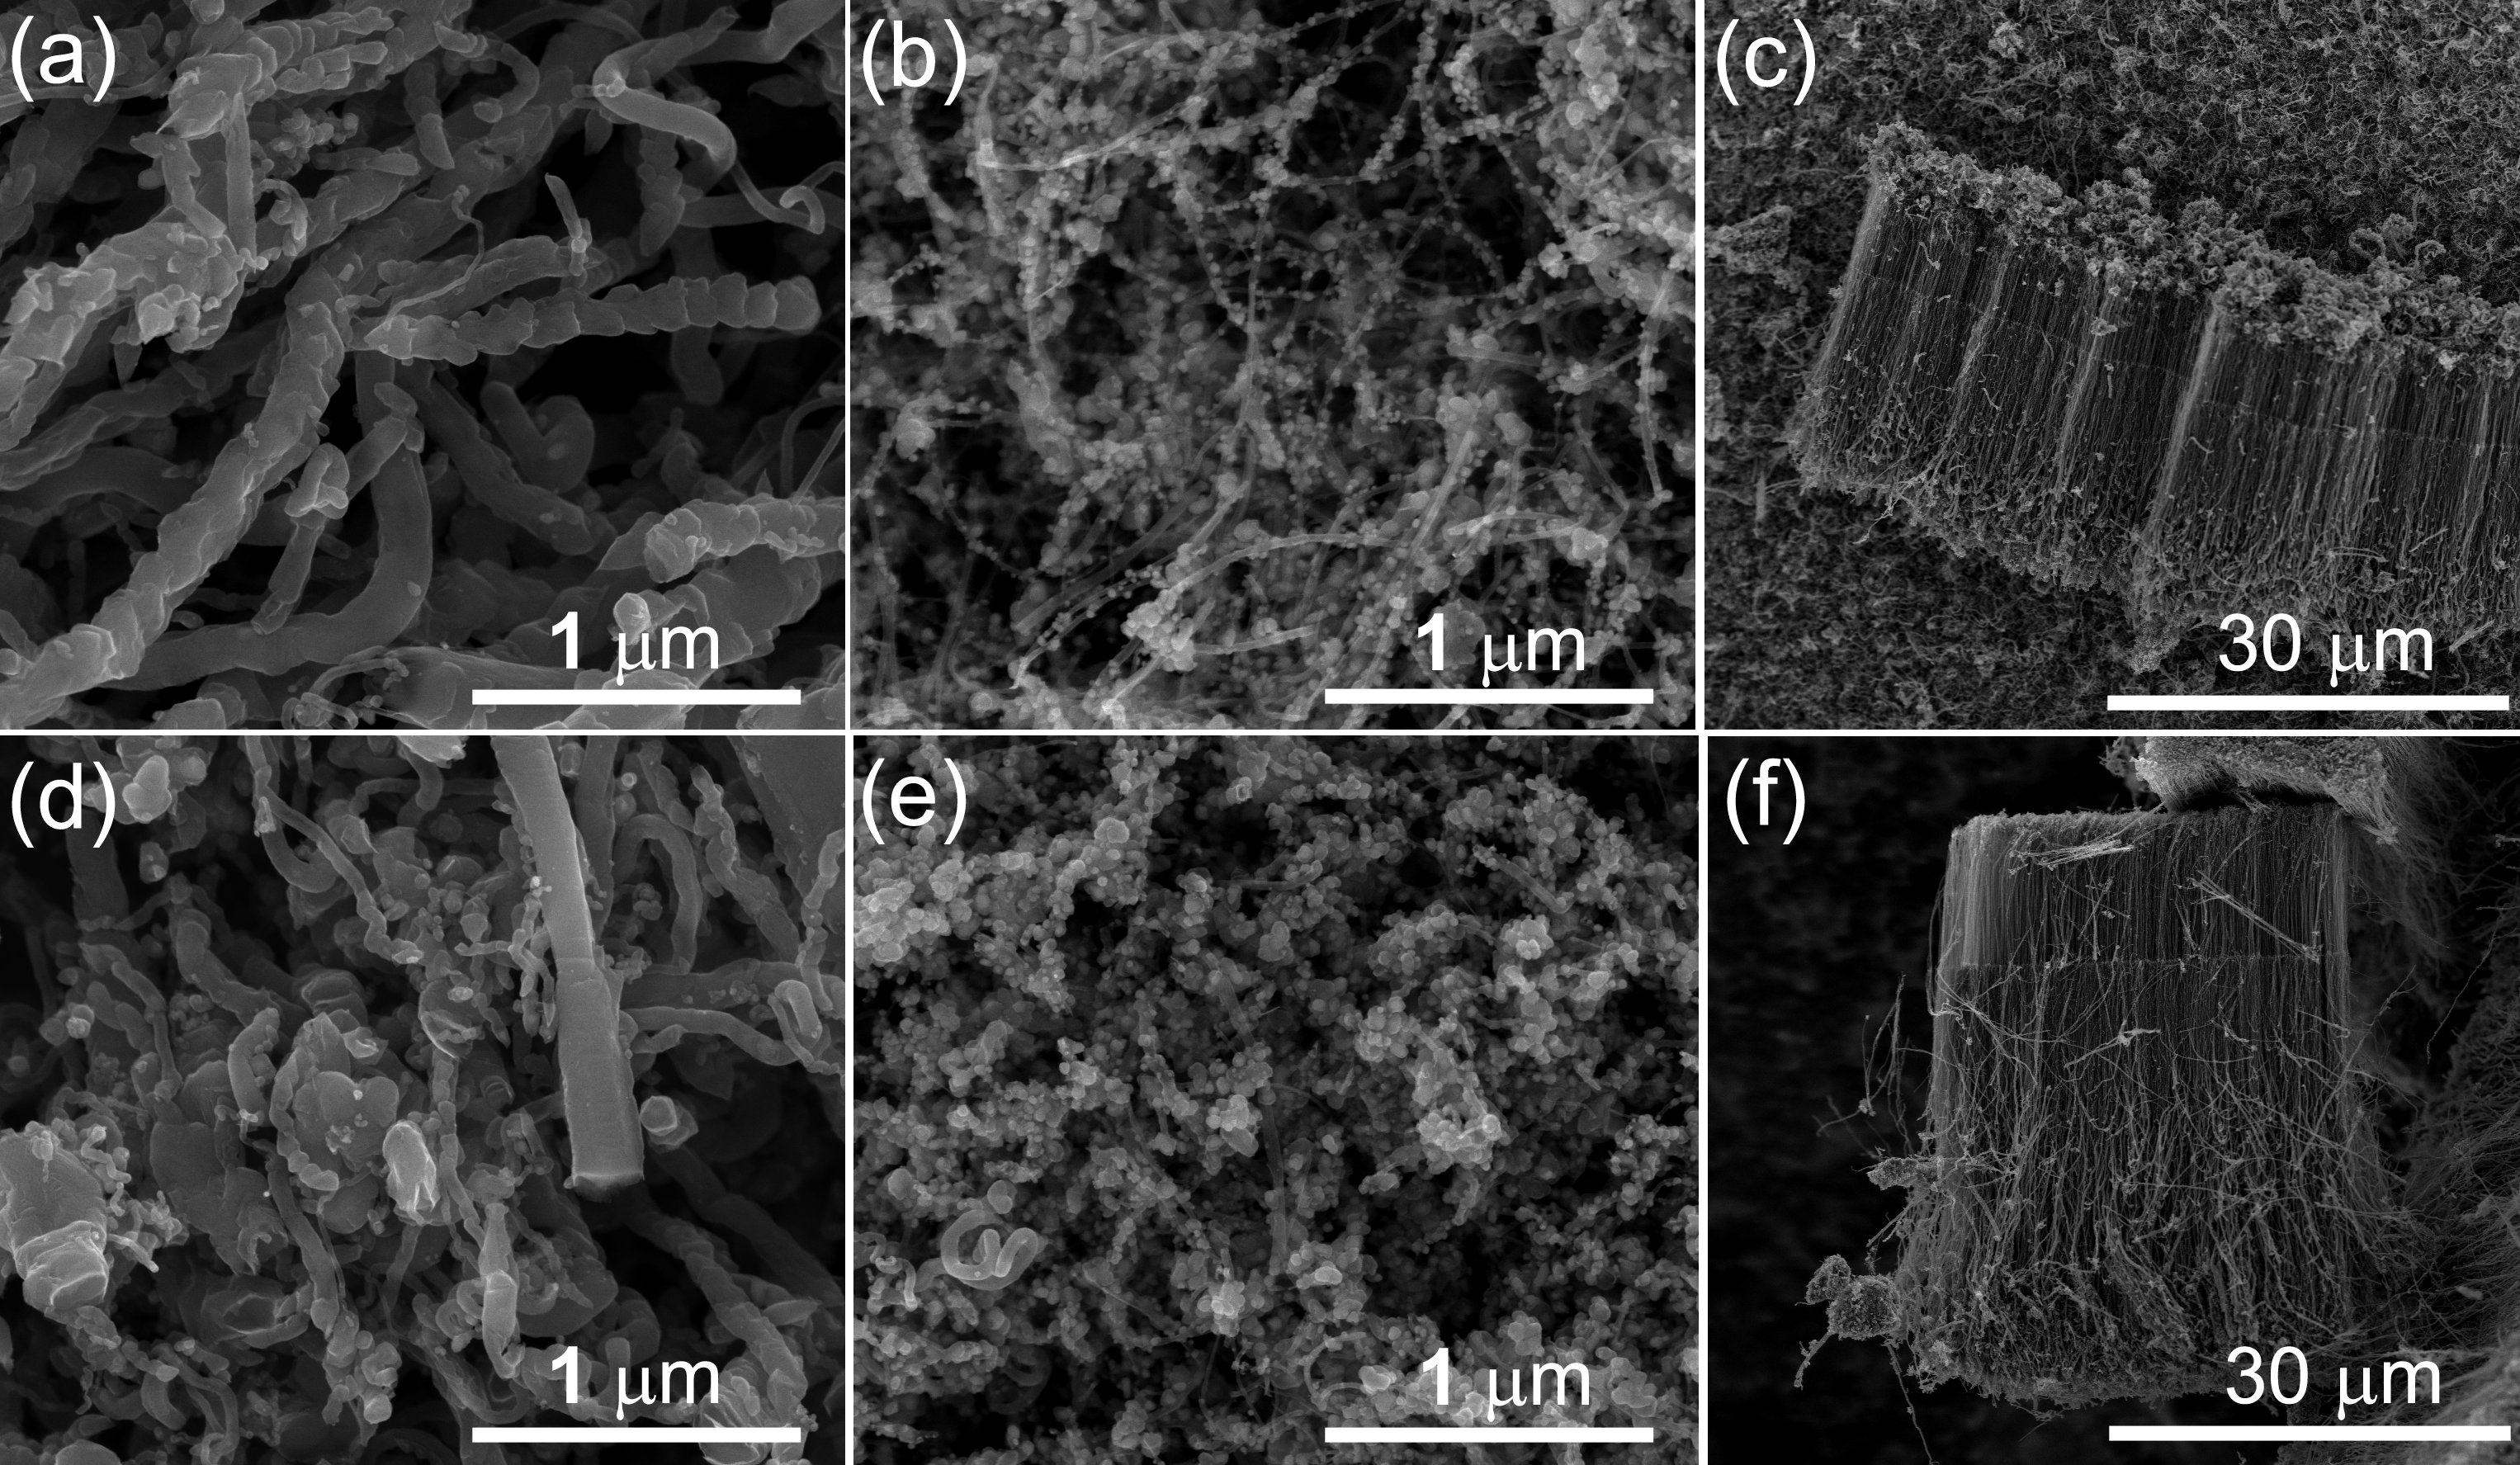
Fig. S6. SEM images of the aligned N-MWCNTs grew over the quartz tube used as substrate. The carbon nanotubes were fabricated using the CVD equipment showed in Fig. S5. (a), (b) and (c) correspond to one part of the sample and (d), (e) and (f) to another different part. (a) and (d) correspond to the root and (b) and (e) to tip of CNT. Note the similar aspect (no morphology) in root and in tip in both cases. Thick CNT with multiple defects at root and thin with attached nanoparticles at tip. As can be seen in (c) and (f) there is also different lengths depending the part of the sample of carbon nanotubes are analyzed [40].


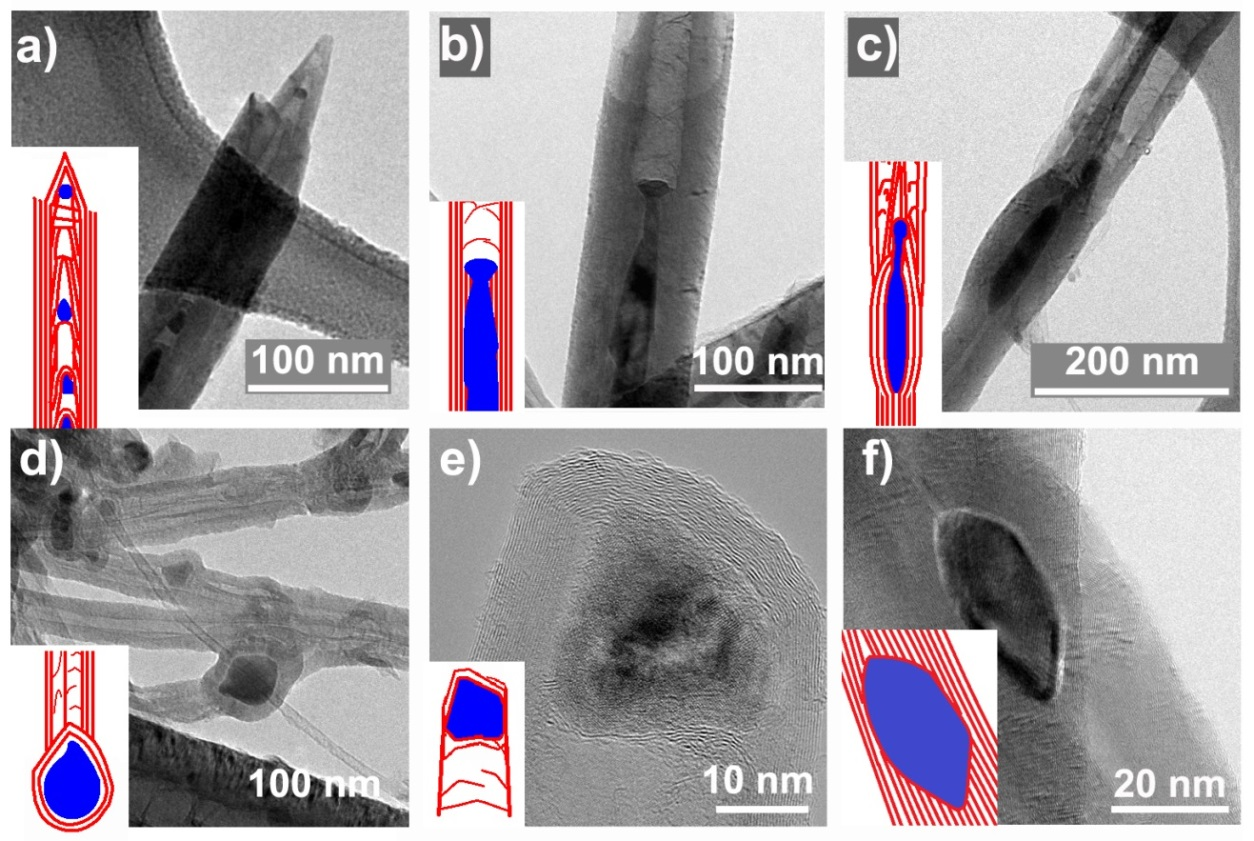


Figure S7. **HRTEM** images of **nanoparticles encapsulated in N-MWCNTs corresponding to the simple CNx-4. Several morphologies were observed in this case:** (a) small nanoparticles along the nanotube; (b) elongated nanoparticle formed by two attached shapes; (c) also elongated nanoparticle similar than the previous but with more separation between the two shapes; (d) big espherical nanoparticles; (e) square-like nanoparticles; (f) seed-like **nanoparticles.**


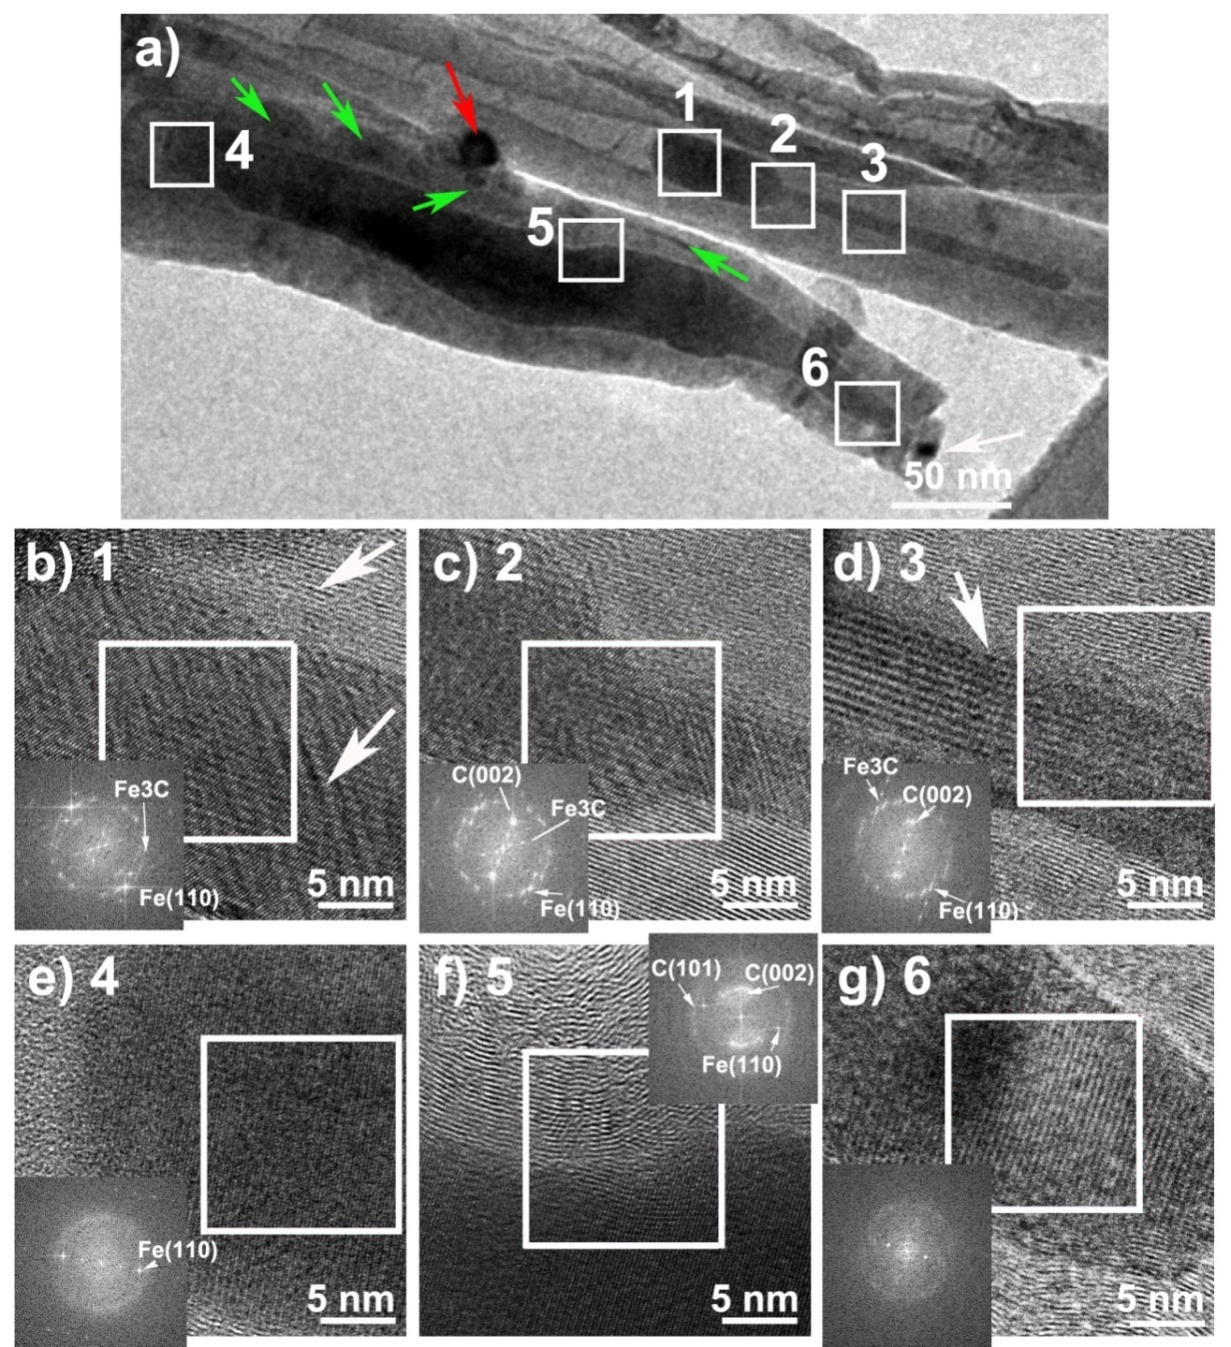


Figura S8. (a) HRTEM image of CNx-4 N-MWCNTs; the image contains several white squares pointed out diverse zones of observed nanoparticles. (b)-(g) HRTEM images of such zones which also contain Fourier transform (insets in each image) obtained of respective white squares.

Figura S9. High resolution transmission electron microscopy images of encapsulated metallic nanoparticles present in N-MWNTs synthesized using a NaCl solution-filled trap. The inset in each image is a drawing that represents the shape of each corresponding nanoparticle. The shape of the nanoparticles can be (a) “spherical” nanoparticle at the tip of sharp broken N-MWNTs, attached at the end of a long compartment; (b) “cylinder” type nanoparticles encapsulated in N-MWNTs; (c) “deformed” nanoparticles which are encapsulated, (d) “seed”-like nanoparticle encapsulated within N-MWNTs; (e) “oval” nanoparticles encased on the N-MWNTs walls, most likely due to formation of twin carbon nanotubes; or (f) rare “arrow” encapsulated nanoparticles that display a sharp tip that fills a narrow core section of a nanotube.
